# Supplementary material for: Expression of Elafin and CD200 as Immune Checkpoint Molecules Involved in Celiac Disease
Source: MDPI journal article supplement (doi:10.3390/ijms25020852), 2024-01-10
Supplement: s1 [file s1]

**Supplementary Table S1.** Clinical data of patients with Celiac disease

| Patient   | Age (year) | Sex | AATG (IgA) | AAEM | Atrophy grade (Marsh criteria) | HLA-DQB1  |
|-----------|------------|-----|------------|------|--------------------------------|-----------|
| Celiac 1  | 4          | F   | >200       | +    | 3C                             | 0201-0202 |
| Celiac 2  | 4          | F   | >200       | +    | 3C                             | 0201-0202 |
| Celiac 3  | 1          | F   | >150       | +    | 3B                             | 0301-0302 |
| Celiac 4  | 3          | F   | >50        | +    | 3A                             | 0201-0603 |
| Celiac 5  | 12         | M   | >200       | +    | 3C                             | 0201-0503 |
| Celiac 6  | 7          | M   | >125       | +    | 3A                             | 0201-0301 |
| Celiac 7  | 1          | F   | >125       | +    | 2                              | 0201-0602 |
| Celiac 8  | 5          | F   | >125       | +    | 3A                             | 0201-0501 |
| Celiac 9  | 10         | M   | >200       | +    | 3C                             | 0201-0301 |
| Celiac 10 | 2          | F   | >125       | +    | 3B                             | 0301-0302 |
| Celiac 11 | 10         | F   | >125       | +    | 3B                             | 0201-0202 |
| Celiac 12 | 2          | F   | >25        | +    | 1                              | 0301-0302 |
| Celiac 13 | 3          | M   | >125       | +    | 3C                             | 0201-0604 |
| Celiac 14 | 5          | M   | >200       | +    | 3C                             | 0201-0202 |
| Celiac 15 | 6          | F   | >150       | +    | 3A                             | 0201-0501 |
| Celiac 16 | 8          | F   | >125       | +    | 3A                             | 0201-0503 |
| Celiac 17 | 2          | M   | >125       | +    | 3B                             | 0201-0301 |
| Celiac 18 | 11         | F   | >200       | +    | 3C                             | 0201-0202 |
| Celiac 19 | 7          | M   | >200       | +    | 3C                             | 0201-0501 |
| Celiac 20 | 9          | F   | >125       | +    | 3B                             | 0201-0301 |
| Celiac 21 | 6          | F   | >150       | +    | 3A                             | 0201-0301 |
| Celiac 22 | 12         | F   | >150       | +    | 3C                             | 0201-0202 |
| Celiac 23 | 7          | M   | >200       | +    | 3C                             | 0201-0202 |
| Celiac 24 | 10         | F   | >50        | +    | 3B                             | 0201-0503 |
| Celiac 25 | 11         | F   | >200       | +    | 3C                             | 0301-0302 |
| Celiac 26 | 6          | M   | >125       | +    | 2                              | 0201-0602 |
| Celiac 27 | 9          | F   | >200       | +    | 3B                             | 0201-0501 |
| Celiac 28 | 3          | M   | >200       | +    | 3A                             | 0301-0302 |
| Celiac 29 | 5          | F   | >125       | +    | 3A                             | 0201-0301 |
| Celiac 30 | 10         | M   | >150       | +    | 3B                             | 0201-0202 |
| Celiac 31 | 13         | F   | >50        | +    | 2                              | 0201-0603 |
| Celiac 32 | 5          | M   | >150       | +    | 3C                             | 0301-0302 |
| Celiac 33 | 3          | F   | >200       | +    | 3C                             | 0201-0301 |
| Celiac 34 | 4          | M   | >150       | +    | 3C                             | 0201-0501 |
| Celiac 35 | 6          | M   | >200       | +    | 3B                             | 0201-0202 |
| Celiac 36 | 4          | F   | >125       | +    | 3B                             | 0201,0501 |
| Celiac 37 | 2          | F   | >150       | +    | 3C                             | 0303,0601 |
| Celiac 38 | 2          | F   | >150       | +    | 3C                             | 0201,0202 |
| Celiac 39 | 6          | F   | >200       | +    | 3C                             | 0201,0501 |
| Celiac 40 | 1          | M   | >50        | +    | 2                              | 0302,0301 |
| Celiac 41 | 12         | F   | >200       | +    | 3C                             | 0201,0301 |
| Celiac 42 | 2          | F   | >125       | +    | 3                              | 0201,0202 |
| Celiac 43 | 8          | F   | >200       | +    | 3C                             | 0202,0301 |
| Celiac 44 | 1          | F   | >200       | +    | 3C                             | 0201,0202 |
| Celiac 45 | 5          | M   | >125       | +    | 3B                             | 0301,0302 |

|                  |    |   |      |   |    |           |
|------------------|----|---|------|---|----|-----------|
| <b>Celiac 46</b> | 10 | M | >150 | + | 3C | 0202,0301 |
| <b>Celiac 47</b> | 2  | F | >50  | + | 1  | 0201/0101 |
| <b>Celiac 48</b> | 7  | F | >150 | + | 3B | 0201/0202 |
| <b>Celiac 49</b> | 2  | F | >50  | + | 2  | 0201/0202 |
| <b>Celiac 50</b> | 1  | F | >125 | + | 3A | 0201/0202 |
| <b>Celiac 51</b> | 2  | M | >200 | + | 3C | 0201/0202 |
| <b>Celiac 52</b> | 2  | M | >150 | + | 3B | 0301/0202 |
| <b>Celiac 53</b> | 3  | M | >50  | + | 2  | 0502/0602 |
| <b>Celiac 55</b> | 1  | F | >125 | + | 3C | 0602/0604 |
| <b>Celiac 56</b> | 7  | F | >100 | + | 3C | 0201/0503 |
| <b>Celiac 57</b> | 7  | M | >125 | + | 3A | 0201/0303 |
| <b>Celiac 58</b> | 2  | F | >150 | + | 3B | 0201/0301 |

AAEM: antiendomysial antibody; AATG: antitransglutaminase antibody, expressed as U/ml; HLA: human leukocyte antigen
